# Supplementary material for: A simple approach to strontium sodium tantalite mesocrystals with ultra-high photocatalytic properties for water splitting
Source: Royal Society of Chemistry journal article supplement (doi:10.1039/c2jm16387j), 2012-01-01
Supplement: c2jm16387j.pdf [file c2jm16387j.pdf]

## Electronic Supplementary Information

### A simple approach to strontium sodium tantalite mesocrystals with ultra-high photocatalytic properties for water splitting

By Jingxue Sun, Gang Chen,\* Jian Pei, Rencheng Jin, Qun Wang and Xinying Guang

*Department of Chemistry, Harbin Institute of Technology, Harbin 150001, P. R. China.*

*Fax: (+86)-451-86413753; Tel: (+86)-0451-86413753;*

*E-mail: [gchen@hit.edu.cn](mailto:gchen@hit.edu.cn)*

**Table S1** Lattice parameters of the as prepared SNT samples

| SNT samples    | Lattice parameters |              |              |
|----------------|--------------------|--------------|--------------|
|                | <i>a</i> /nm       | <i>b</i> /nm | <i>c</i> /nm |
| Sr = 0.005     | 0.5515             | 0.7753       | 0.5498       |
| Sr = 0.01      | 0.5517             | 0.7758       | 0.5503       |
| Sr = 0.02      | 0.5521             | 0.7766       | 0.5507       |
| Sr = 0.03      | 0.5526             | 0.7775       | 0.5513       |
| Sr = 0.04      | 0.5531             | 0.7783       | 0.5520       |
| JCPDS #25-0863 | 0.5513             | 0.7750       | 0.5494       |

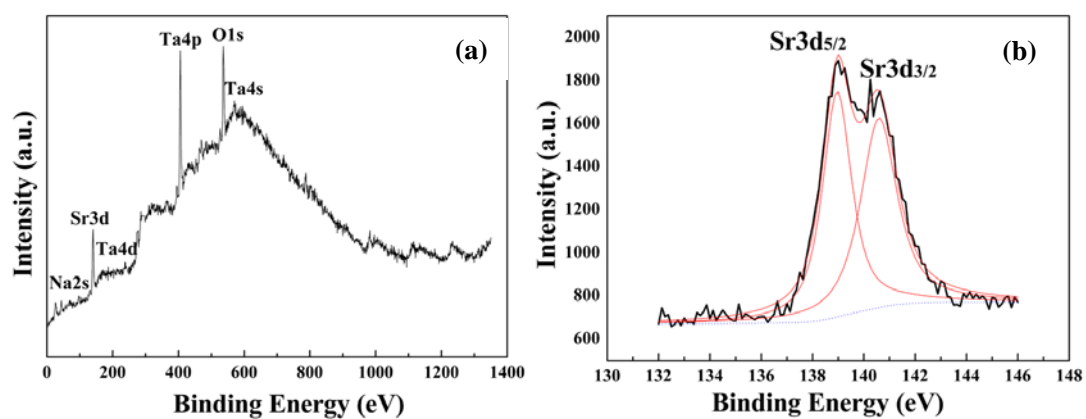

**Figure S1** XPS data from the surface of the sample: a) the whole-range spectrum; b) Sr 3d core-level spectrum.

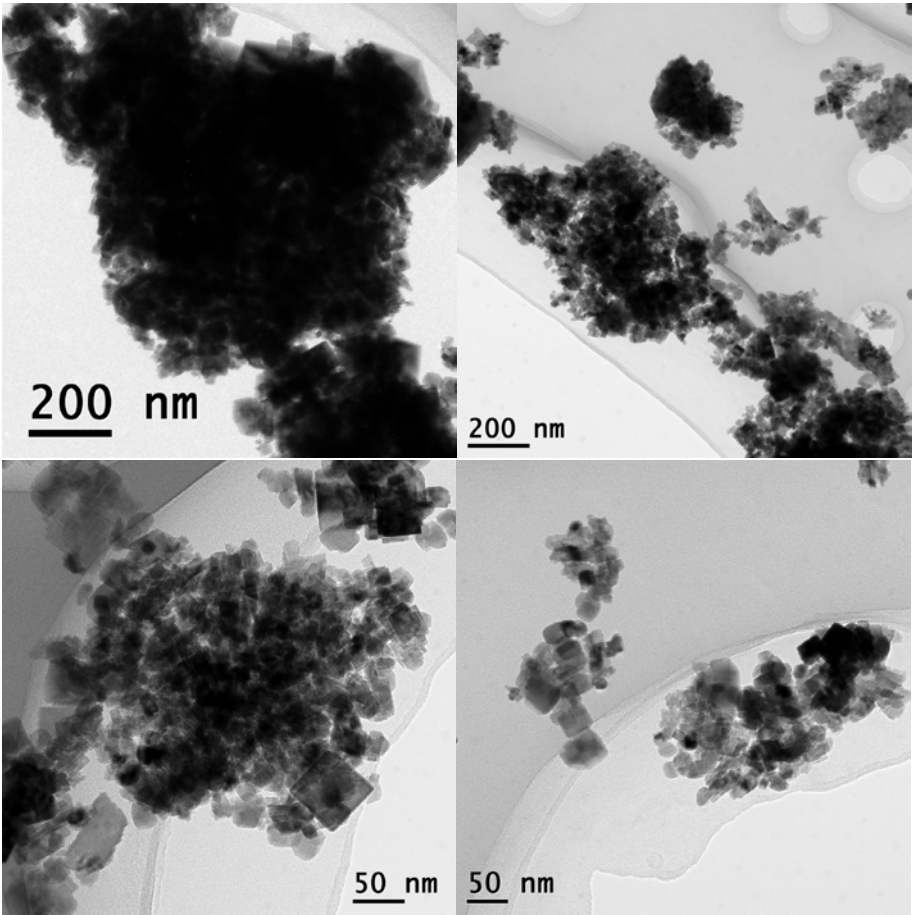

**Figure S2** TEM image of SNT at 30 min.

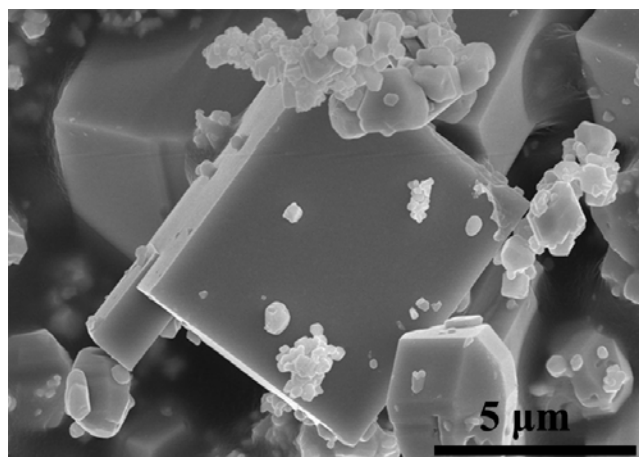

**Figure S3.** SEM images of NaTaO<sub>3</sub> synthesized in molten salt.

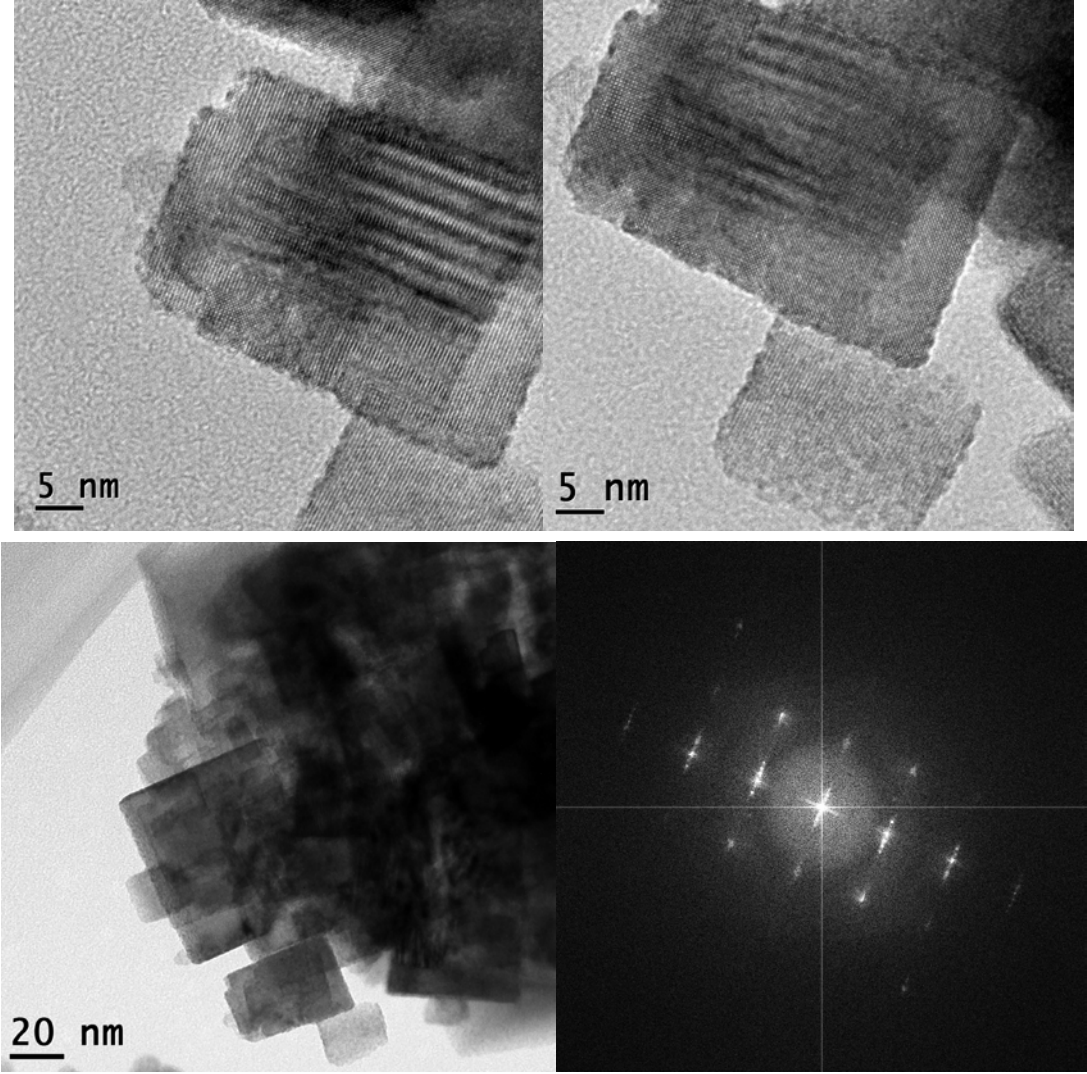

**Figure S4** Detail TEM ,HRTEM and reduced FFT images of SNT obtained at W=2:1

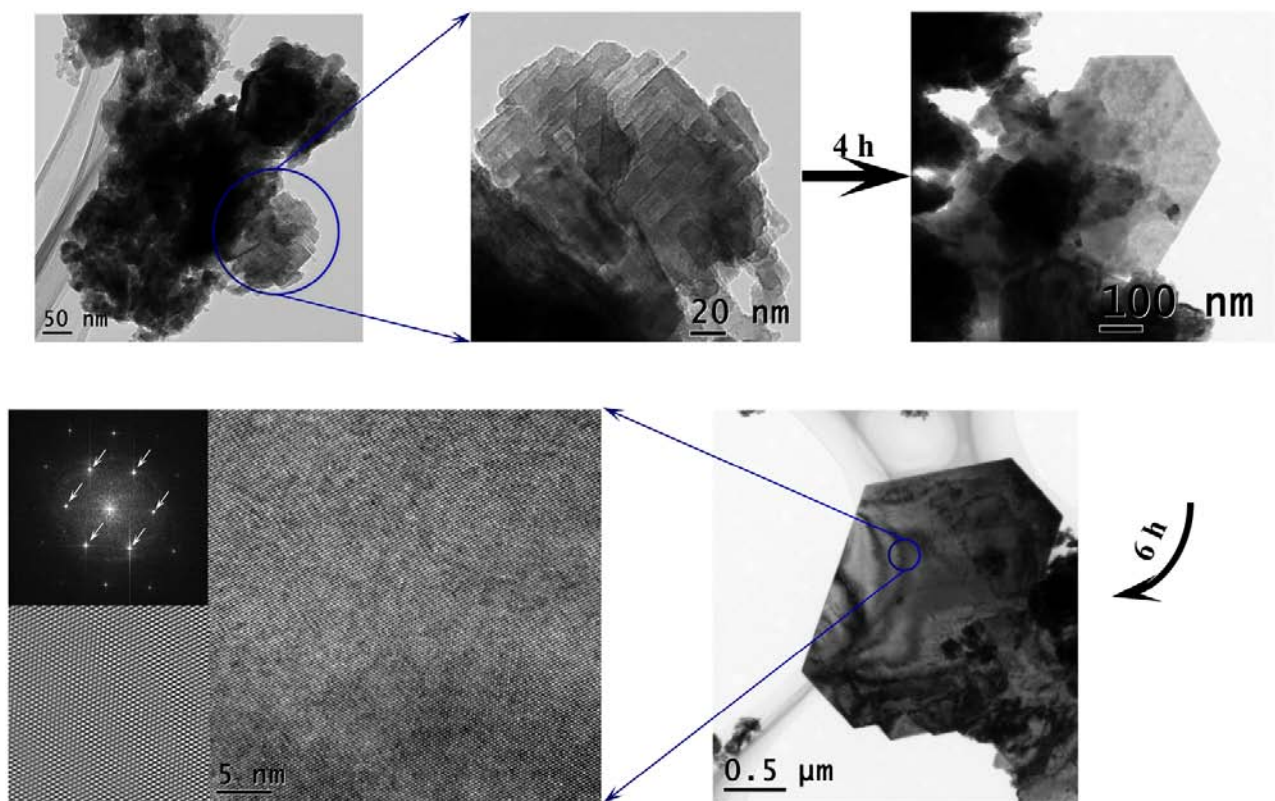

**Figure S5** Structure changing of SNT at a prolonged reaction time to 6 h.

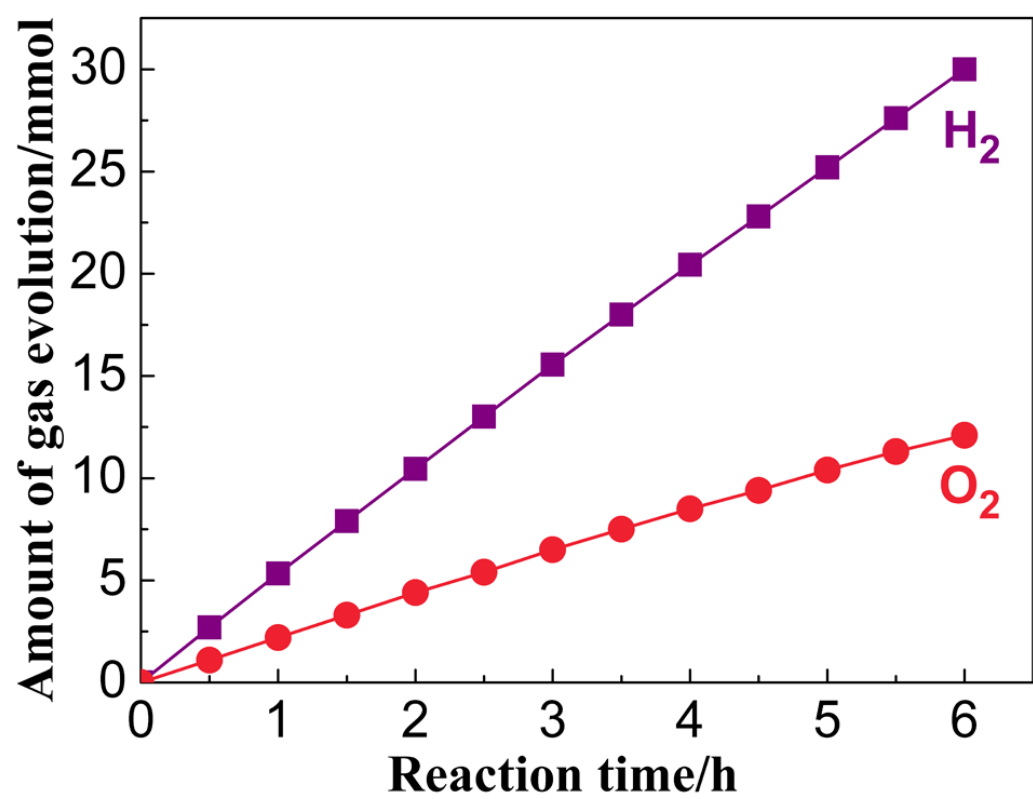

**Figure S6** Amount of gas evolution according to reaction time for SNT-NiO powders.

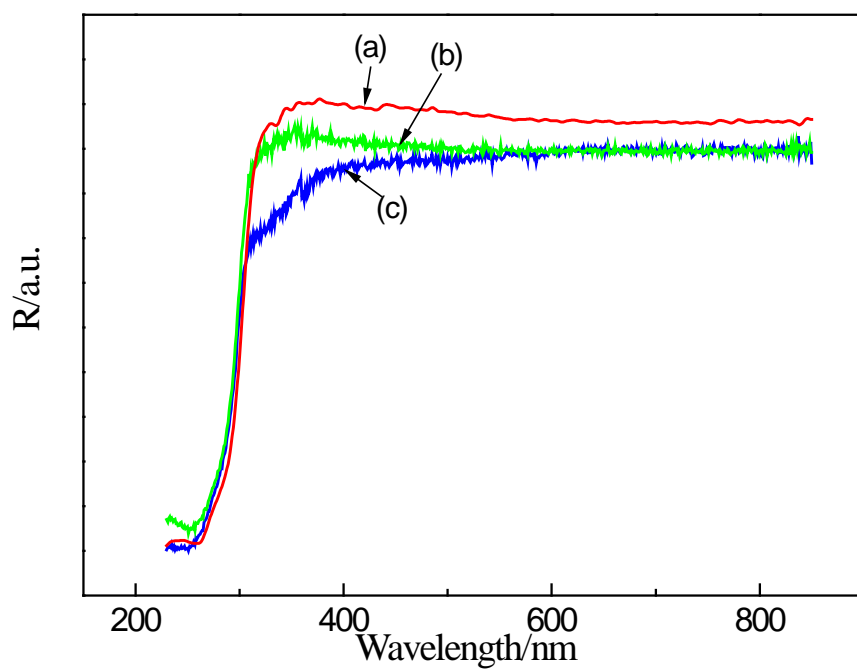

**Figure S7** UV-vis spectra of SNT mesocrystals at different amount of Sr: (a) Sr=0, (b) Sr=0.01 and (c) Sr=0.02
